# Supplementary material for: Consolidated bioprocessing of Populus using Clostridium (Ruminiclostridium) thermocellum: a case study on the impact of lignin composition and structure
Source: PubMed Central journal article supplement (PMC4743434; doi:10.1186/s13068-016-0445-x), 2016-02-04
Supplement: 13068_2016_445_MOESM1_ESM.pdf [file 13068_2016_445_MOESM1_ESM.pdf]

**Additional file 1**

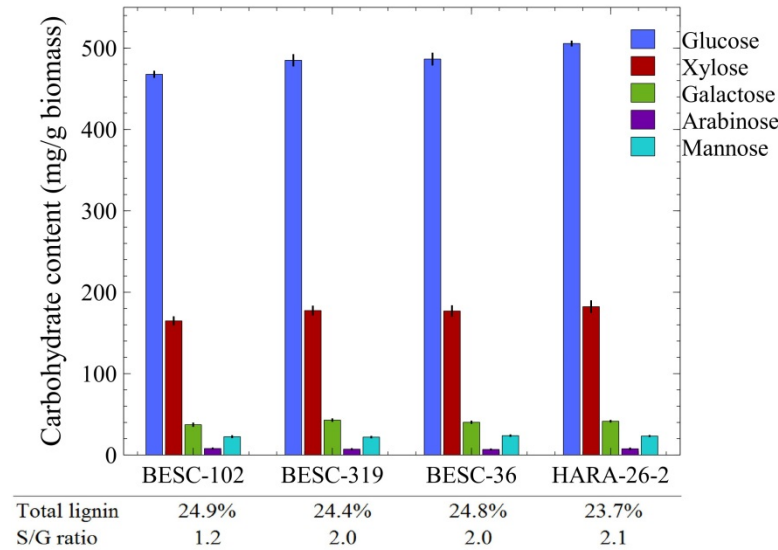

Figure A. 1. Selected *Populus* with comparable carbohydrate and total lignin content; three individuals had similar S/G ratios while a fourth had the lowest possible S/G ratio composition

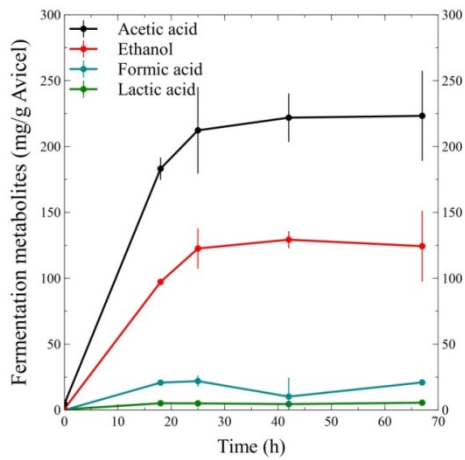

Figure A. 2. Control consolidated bioprocessing of 10g/L glucan (Avicel) showed near complete solubilization within 24 hours and normal fermentation metabolite output

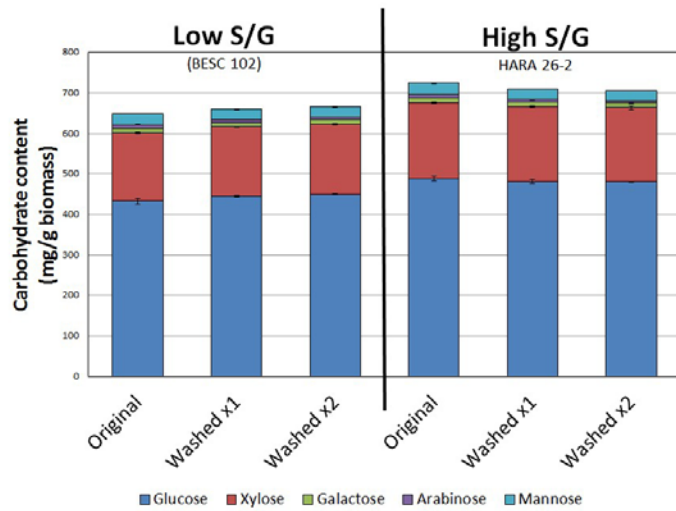

Figure A. 3. Carbohydrate content does not change significantly in *Populus* biomass after one or two wash cleaning cycles

|                 | Total lignin (%) | S/G ratio |
|-----------------|------------------|-----------|
| <b>Low S/G</b>  |                  |           |
| Original        | 25               | 1.1       |
| Washed x1       | 19               | 1.2       |
| Washed x2       | 18               | 1.2       |
| <b>High S/G</b> |                  |           |
| Original        | 24               | 1.9       |
| Washed x1       | 17               | 2.1       |
| Washed x2       | 16               | 2.1       |

Figure A. 4. Total lignin content decreases after the first wash cycle and no significant change with subsequent washes; the lignin S/G ratio increases very slightly in both *Populus* samples
